# Supplementary material for: Application of NMR relaxometry for real-time monitoring of the removal of metal ions from water by synthetic clays
Source: Royal Society of Chemistry journal article supplement (doi:10.1039/d1dt04344g), 2022-01-01
Supplement: d1dt04344g1.pdf [file d1dt04344g1.pdf]

# ELECTRONIC SUPPLEMENTARY INFORMATION

## Application of NMR relaxometry for the real-time monitoring of the removal of metal ions from water by synthetic clays

Stefano Marchesi,<sup>†a</sup> Simone Nascimbene,<sup>†a</sup> Matteo Guidotti,<sup>b</sup> Chiara Bisio<sup>\*a,b</sup> and Fabio Carniato<sup>\*a</sup>

<sup>a</sup> Dipartimento di Scienze e Innovazione Tecnologica, Università degli Studi del Piemonte Orientale  
“Amedeo Avogadro”, Viale Teresa Michel 11, 15121-Alessandria (Italy)

<sup>b</sup> CNR-SCITEC Istituto di Scienze e Tecnologie Chimiche “G. Natta”, Via C. Golgi 19, 20133-  
Milano (Italy)

\*E-mail: [chiara.bisio@uniupo.it](mailto:chiara.bisio@uniupo.it); [fabio.carniato@uniupo.it](mailto:fabio.carniato@uniupo.it)

\*Fax: +39 0131360250; Tel: +39 0131360217, +39 0131360216

### 1) FIGURES

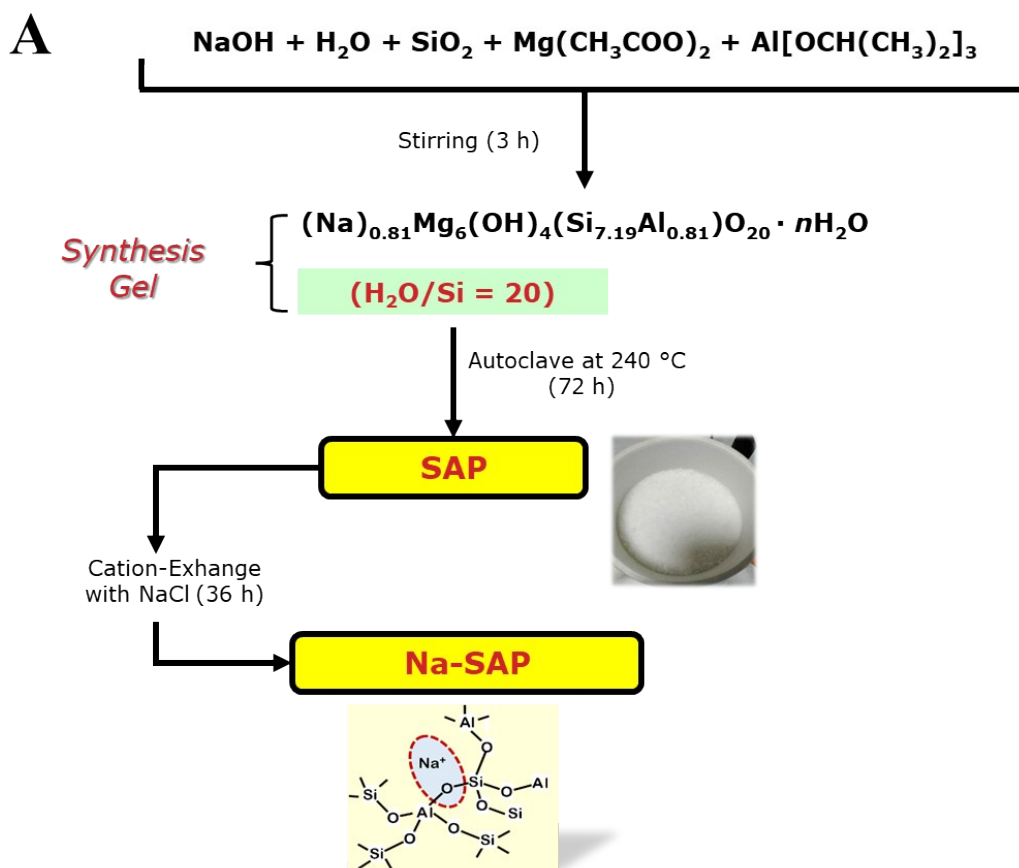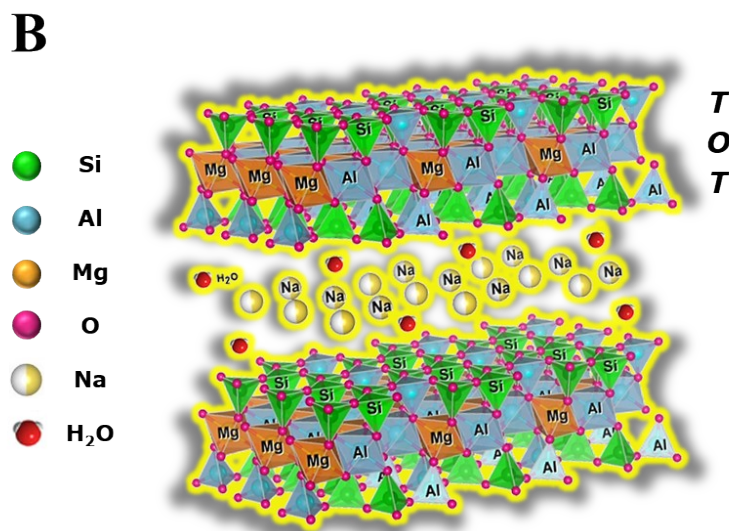

**Scheme S1.** Schematic view of the hydrothermal procedure for the preparation of the Na<sup>+</sup>-exchanged synthetic saponite clay (Na-SAP) (A) and the related structure (B).

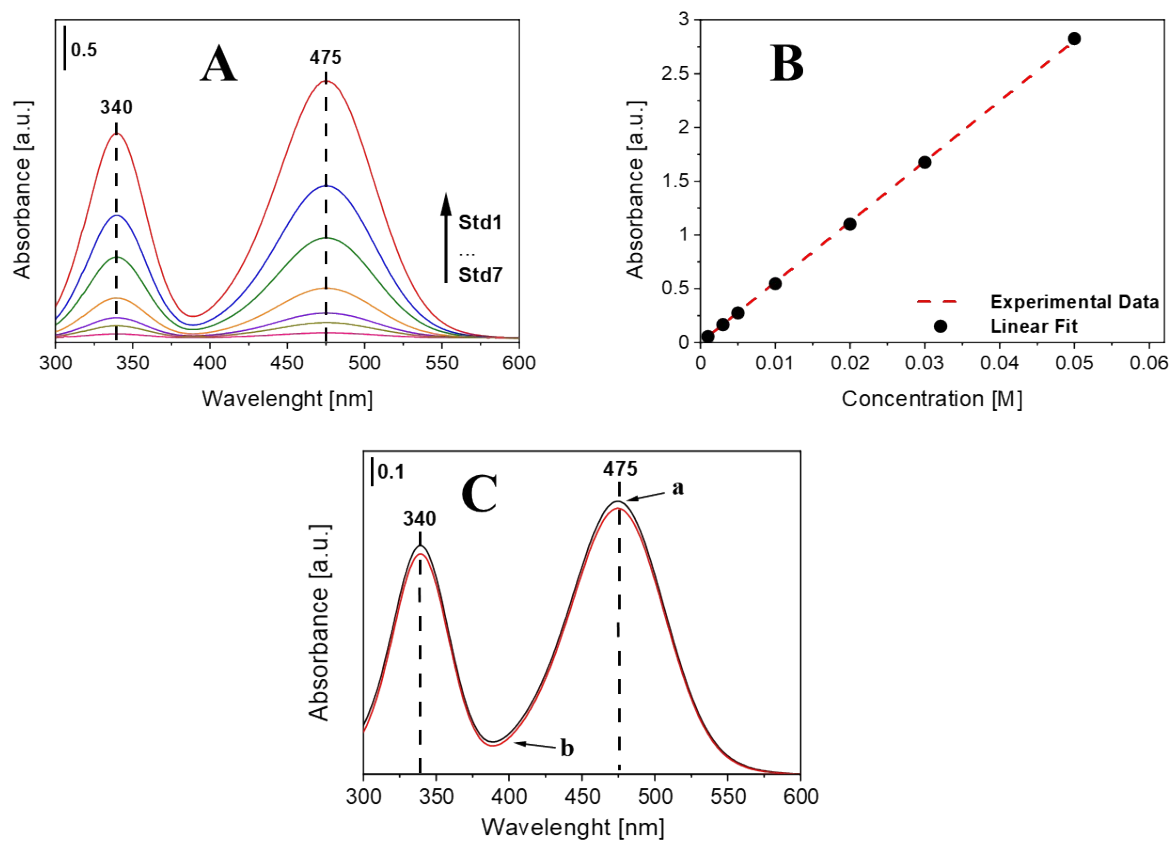

**Fig. S1.** A) UV-Vis spectra of  $[\text{Co}(\text{NH}_3)_6]^{3+}$  standard aqueous solutions at room temperature, in the concentration range of 0.05-0.005 M, used for the calibration curve. B) Calibration curve obtained by UV-Vis spectra of the standards solutions ( $\lambda_{\text{abs}} = 475$  nm). C) UV-Vis spectra of the supernatants of Na-SAP (a) and acid-treated Na-SAP (b) samples, obtained after treatment of the solids in 0.02 M  $[\text{Co}(\text{NH}_3)_6]^{3+}$  aqueous solution at room temperature for 60 h.

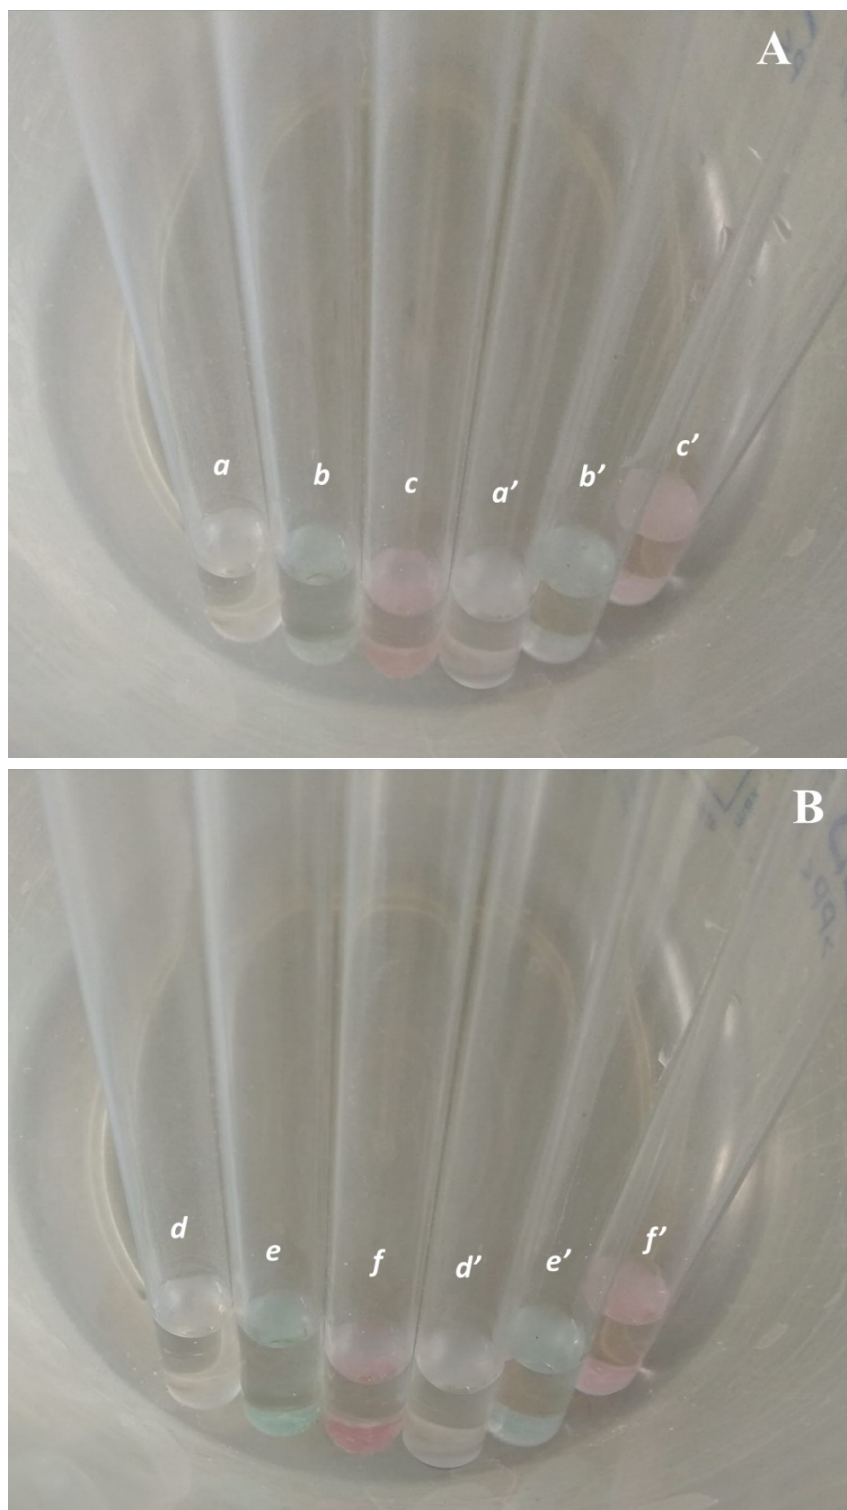

**Fig. S2.** (A) 10mM paramagnetic aqueous solutions after few seconds of contact with Na-SAP in the NMR tubes:  $\text{Gd}^{3+}$  (a),  $\text{Cu}^{2+}$  (b) and  $\text{Co}^{2+}$  (c) at pH = 5.5,  $\text{Gd}^{3+}$  (a'),  $\text{Cu}^{2+}$  (b') and  $\text{Co}^{2+}$  (c') at pH = 3.0. (B) The same solutions after 24 h of contact with the solid:  $\text{Gd}^{3+}$  (d),  $\text{Cu}^{2+}$  (e) and  $\text{Co}^{2+}$  (f) at pH = 5.5,  $\text{Gd}^{3+}$  (d'),  $\text{Cu}^{2+}$  (e') and  $\text{Co}^{2+}$  (f') at pH = 3.0.

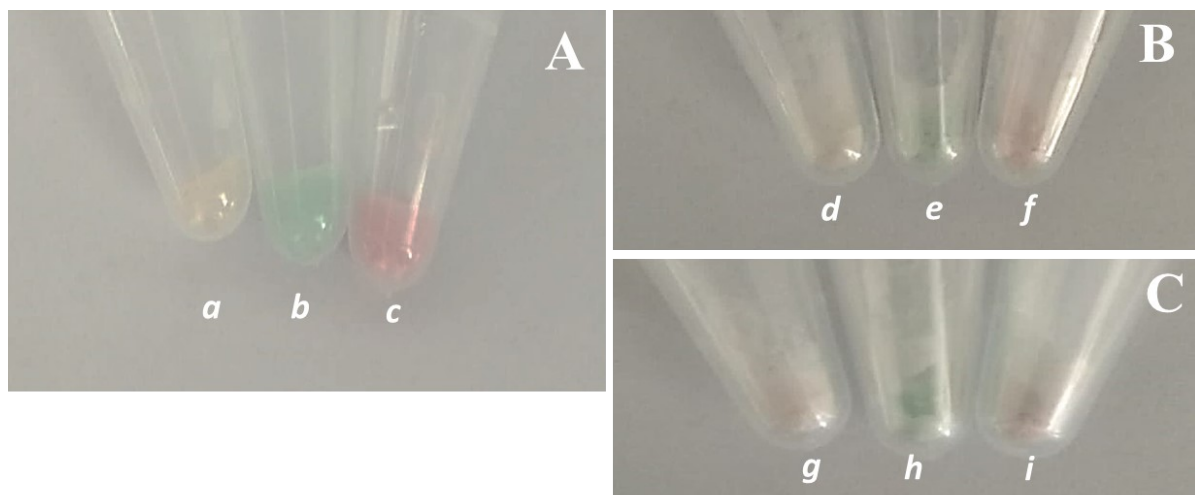

**Fig. S3.** (A) Na-SAP solids after 24 h of contact with 10 mM solutions of  $\text{Gd}^{3+}$  (a),  $\text{Cu}^{2+}$  (b) and  $\text{Co}^{2+}$  (c) at pH = 5.5. (B) Saponite samples after regeneration tests in saturated NaCl solutions at pH = 5.5, for  $\text{Gd}^{3+}$  (d),  $\text{Cu}^{2+}$  (e) and  $\text{Co}^{2+}$  (f). (C) Solids after regeneration at pH 2.5 for  $\text{Gd}^{3+}$  (g),  $\text{Cu}^{2+}$  (h) and  $\text{Co}^{2+}$  (i).

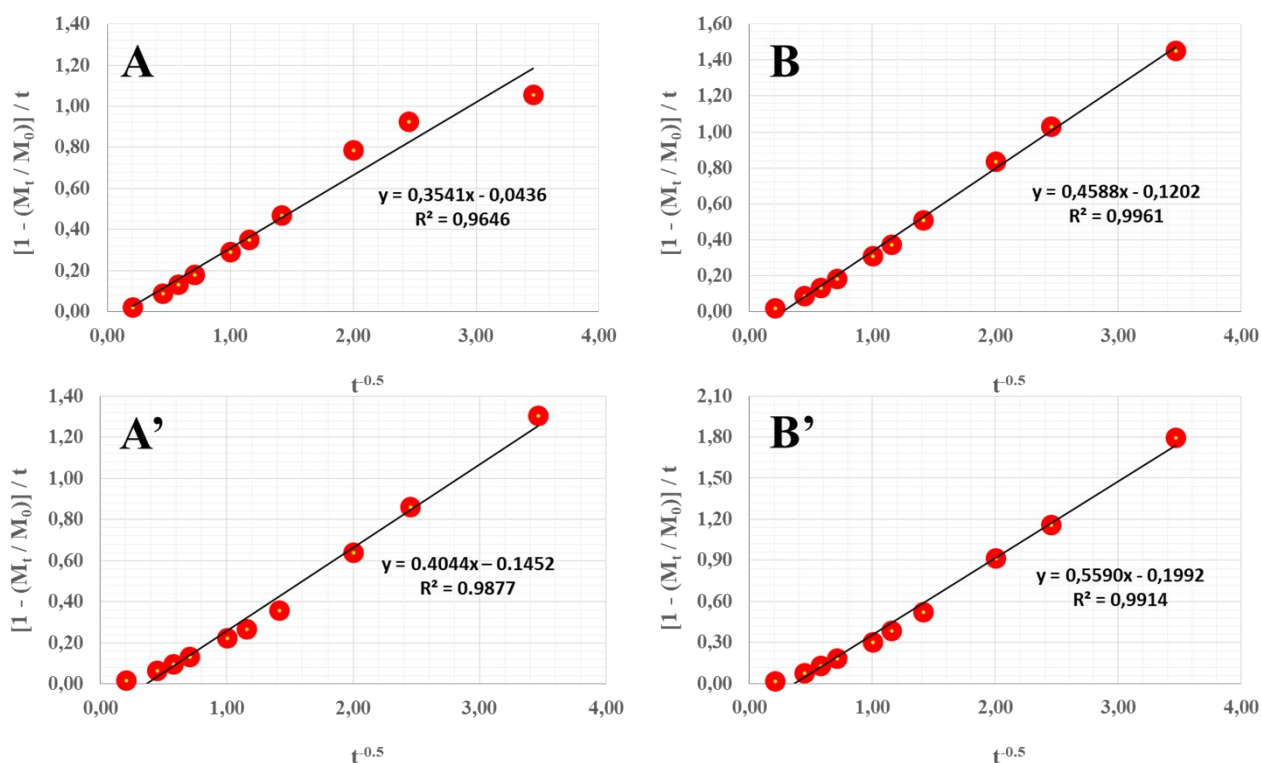

**Fig. S4.** Fitting of the data obtained by  $^1\text{H}$ -NMR relaxometric analysis with a parabolic diffusion kinetic model<sup>1</sup> for the sorption on Na-SAP of  $\text{Cu}^{2+}$  at pH = 5.5 (A) and 3.0 (A'), and of  $\text{Co}^{2+}$  at pH = 5.5 (B) and 3.0 (B').

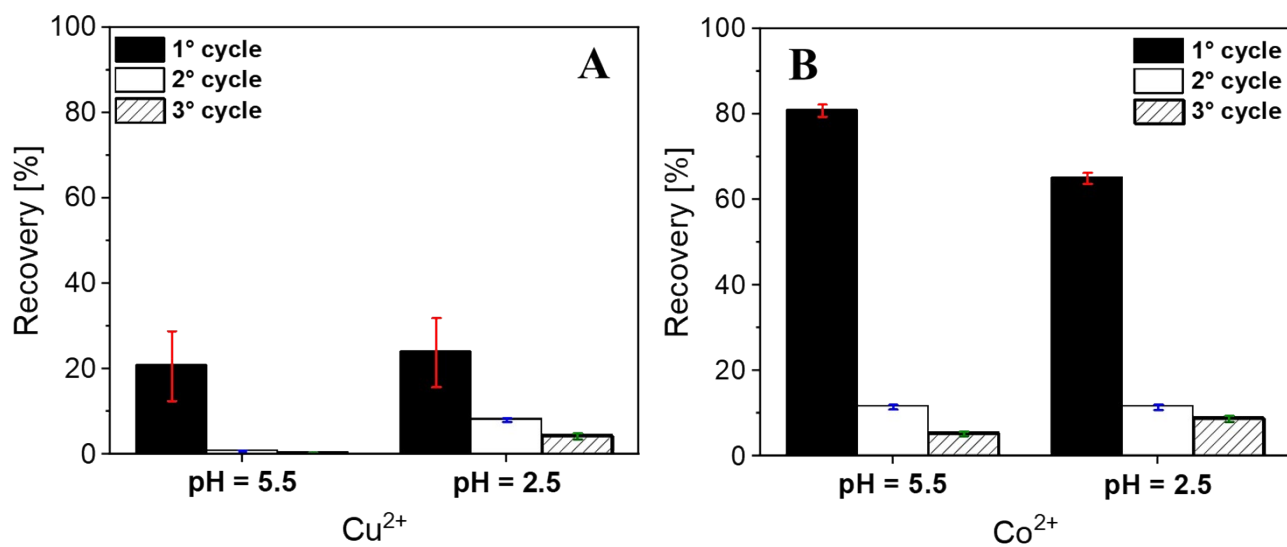

**Fig. S5.**  $\text{Cu}^{2+}$  (A) and  $\text{Co}^{2+}$  (B) release (%) from paramagnetic Na-SAP. The regeneration test was repeated for 3 cycles in saturated NaCl solutions at pH = 5.5 and 2.5.

## 2) TABLES

| pH  | Metal Ion        | NMR Relaxometry |             |               | ICP-OES      |             |               |
|-----|------------------|-----------------|-------------|---------------|--------------|-------------|---------------|
|     |                  | Uptake [%]      | Uptake [mM] | Uptake [mg/g] | Uptake [%]   | Uptake [mM] | Uptake [mg/g] |
| 5.5 | Gd <sup>3+</sup> | 43.55 ± 2.05    | 4.19 ± 0.20 | 32.28 ± 1.52  | 42.33 ± 2.02 | 4.11 ± 0.20 | 31.63 ± 1.50  |
|     | Cu <sup>2+</sup> | 51.38 ± 2.49    | 4.64 ± 0.23 | 14.57 ± 0.71  | 55.91 ± 3.01 | 4.91 ± 0.28 | 15.42 ± 0.87  |
|     | Co <sup>2+</sup> | 51.93 ± 1.61    | 5.33 ± 0.17 | 15.41 ± 0.48  | 58.39 ± 2.98 | 5.91 ± 0.27 | 17.07 ± 0.83  |
| 3.0 | Gd <sup>3+</sup> | 35.18 ± 2.03    | 3.44 ± 0.20 | 26.48 ± 1.53  | 40.04 ± 3.51 | 3.90 ± 0.34 | 30.06 ± 2.60  |
|     | Cu <sup>2+</sup> | 41.37 ± 3.62    | 3.88 ± 0.34 | 12.01 ± 1.05  | 41.06 ± 3.73 | 3.82 ± 0.35 | 11.84 ± 1.09  |
|     | Co <sup>2+</sup> | 41.61 ± 1.80    | 4.27 ± 0.19 | 12.34 ± 0.53  | 44.13 ± 4.82 | 4.52 ± 0.46 | 13.07 ± 1.40  |

**Tab. S1.** Uptake values after 24 h of Gd<sup>3+</sup>, Cu<sup>2+</sup> and Co<sup>2+</sup> ions obtained from NMR relaxometric and ICP-OES elemental analyses, expressed as % (respect to the starting concentration of each metal solution), mM and mg/g.

| Metal Ion        | Ionic Radius (Å) |
|------------------|------------------|
| Gd <sup>3+</sup> | 1.05             |
| Cu <sup>2+</sup> | 0.73             |
| Co <sup>2+</sup> | 0.65             |

**Tab. S2.** Ionic radii values of Gd<sup>3+</sup>, Cu<sup>2+</sup> and Co<sup>2+</sup> ions.<sup>2</sup>

|                                                                  | <b>Metal Ion</b>       | <b>Total Recovery [%]</b> |
|------------------------------------------------------------------|------------------------|---------------------------|
| <b>Regeneration tests in saturated NaCl solution at pH = 5.5</b> | <b>Gd<sup>3+</sup></b> | <b>50.6 ± 8.5</b>         |
|                                                                  | <b>Cu<sup>2+</sup></b> | <b>22.1 ± 9.8</b>         |
|                                                                  | <b>Co<sup>2+</sup></b> | <b>97.9 ± 1.4</b>         |
| <b>Regeneration tests in saturated NaCl solution at pH = 2.5</b> | <b>Gd<sup>3+</sup></b> | <b>60.2 ± 7.7</b>         |
|                                                                  | <b>Cu<sup>2+</sup></b> | <b>36.7 ± 9.0</b>         |
|                                                                  | <b>Co<sup>2+</sup></b> | <b>85.6 ± 0.9</b>         |

**Tab. S3.** Recovery (%) values for Gd<sup>3+</sup>, Cu<sup>2+</sup> and Co<sup>2+</sup> at pH 5.5 and 2.5, calculated by <sup>1</sup>H NMR relaxometry analyses carried out at 10 MHz and 298 K. The regeneration tests were performed in saturated NaCl solutions at pH = 5.5 and 2.5.



### 3) REFERENCES

1. H. Zhang, D. Pan, X. Duan, *J. Phys. Chem. C*, 2009, **113**, 12140-12148.
2. A) R. D. Shannon, *Acta Cryst.*, 1976, **A32**, 751-767; B) Shriver and P. Atkins, *Inorganic Chemistry* (5th Ed.), Oxford University Press, New York, 2010.
